# Supplementary material for: Cu(iii)triarylcorroles with asymmetric push–pull meso-substitutions: tunable molecular electrochemically catalyzed hydrogen evolution
Source: Royal Society of Chemistry journal article supplement (doi:10.1039/c7dt00716g), 2017-01-01
Supplement: c7dt00716g1.pdf [file c7dt00716g1.pdf]

## Supplementary Information

### **Cu(III)Triarylcorroles with Asymmetric Push-Pull meso-Substitutions: Tunable Molecular Electrochemically Catalyzed Hydrogen Evolution**

*Xu Liang,<sup>a,\*</sup> Yingjie Niu,<sup>a</sup> Qianchong Zhang,<sup>c</sup> John Mack,<sup>b,\*</sup> Xiaoyi Yi,<sup>d</sup> Zweli Hlatshwayo,<sup>b</sup> Tebello*

*Nyokong,<sup>b</sup> Minzhi Li,<sup>a</sup> and Weihua Zhu<sup>a,\*</sup>*

<sup>a</sup> School of Chemistry and Chemical Engineering, JiangSu University, Zhenjiang 213200, P. R. China.

<sup>b</sup> Department of Chemistry, Rhodes University, Grahamstown 6140, South Africa.

<sup>c</sup> State Key Laboratory of Physical Chemistry of Solid Surface and Department of Chemistry, College of Chemistry and Chemical Engineering, Xiamen University, Xiamen 361005, P. R. China.

<sup>d</sup> School of Chemistry and Chemical Engineering, Central South University, Changsha 410083, P. R. China.

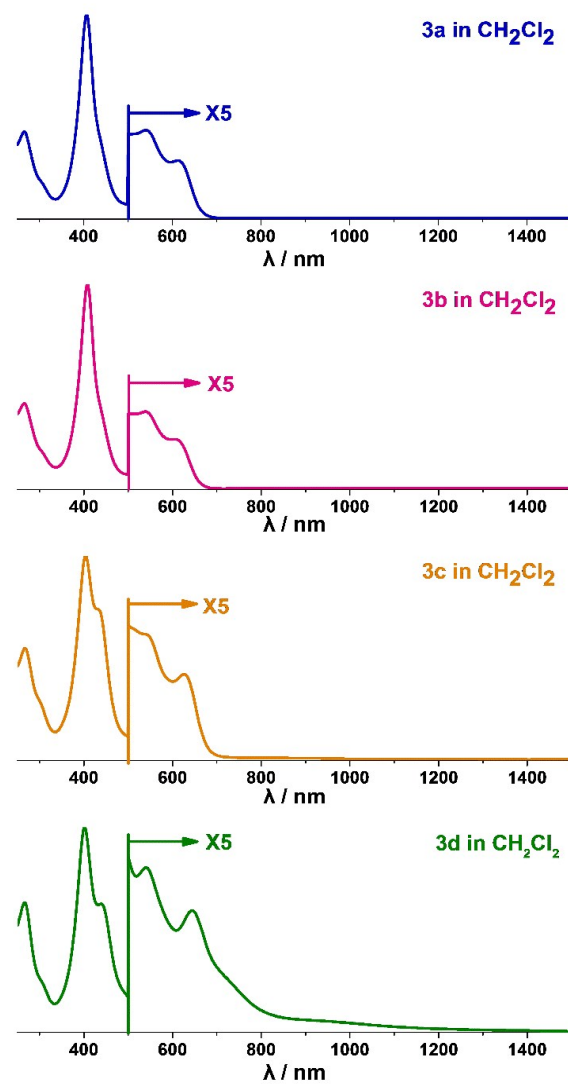

**Figure S1** UV-visible-NIR absorption spectra of Cu(III)corrols **3a-d** at room temperature in CH<sub>2</sub>Cl<sub>2</sub>.

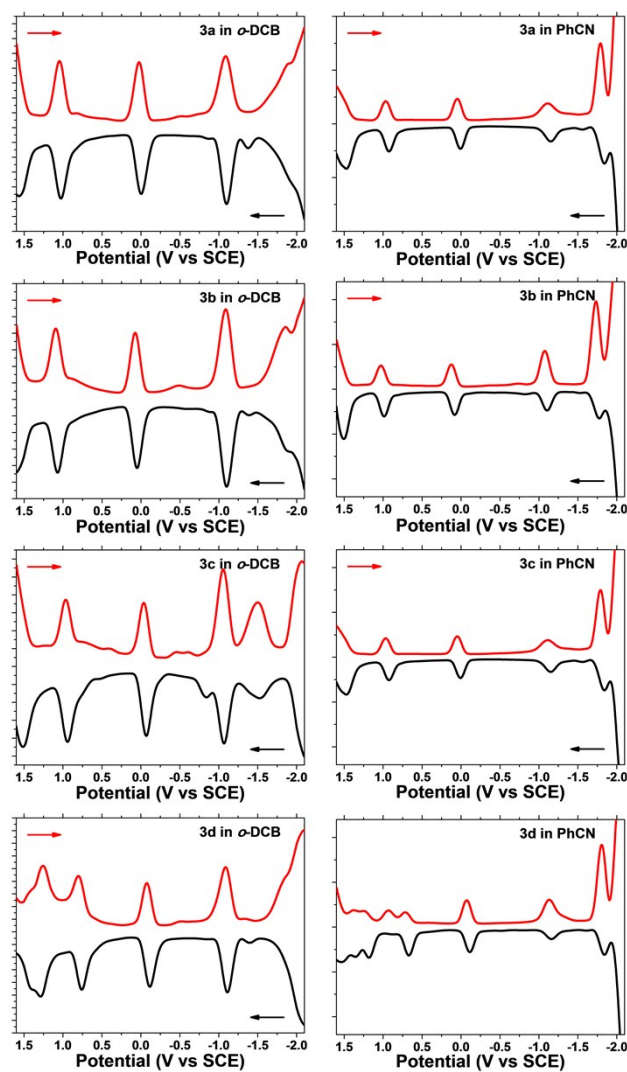

**Figure S2** DPV measurements of **3a-d** in *o*-DCB (left) and PhCN (right) containing 0.1 M  $[\text{NBu}_4]^+[\text{ClO}_4]^-$  (TBAP) as a supporting electrolyte.

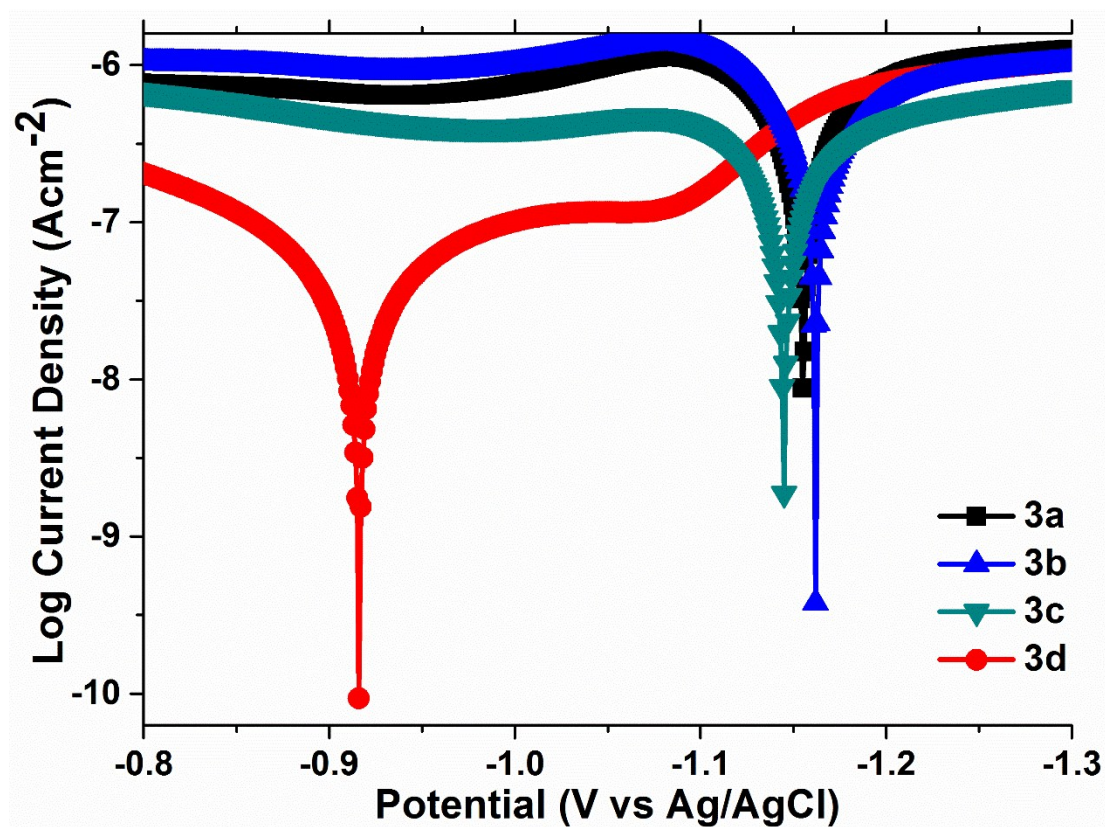

Figure S3 Tafel plot of **3a-d** in PhCN containing 0.1 M  $[\text{NBu}_4]^+[\text{ClO}_4]^-$  (TBAP) as a supporting electrolyte.

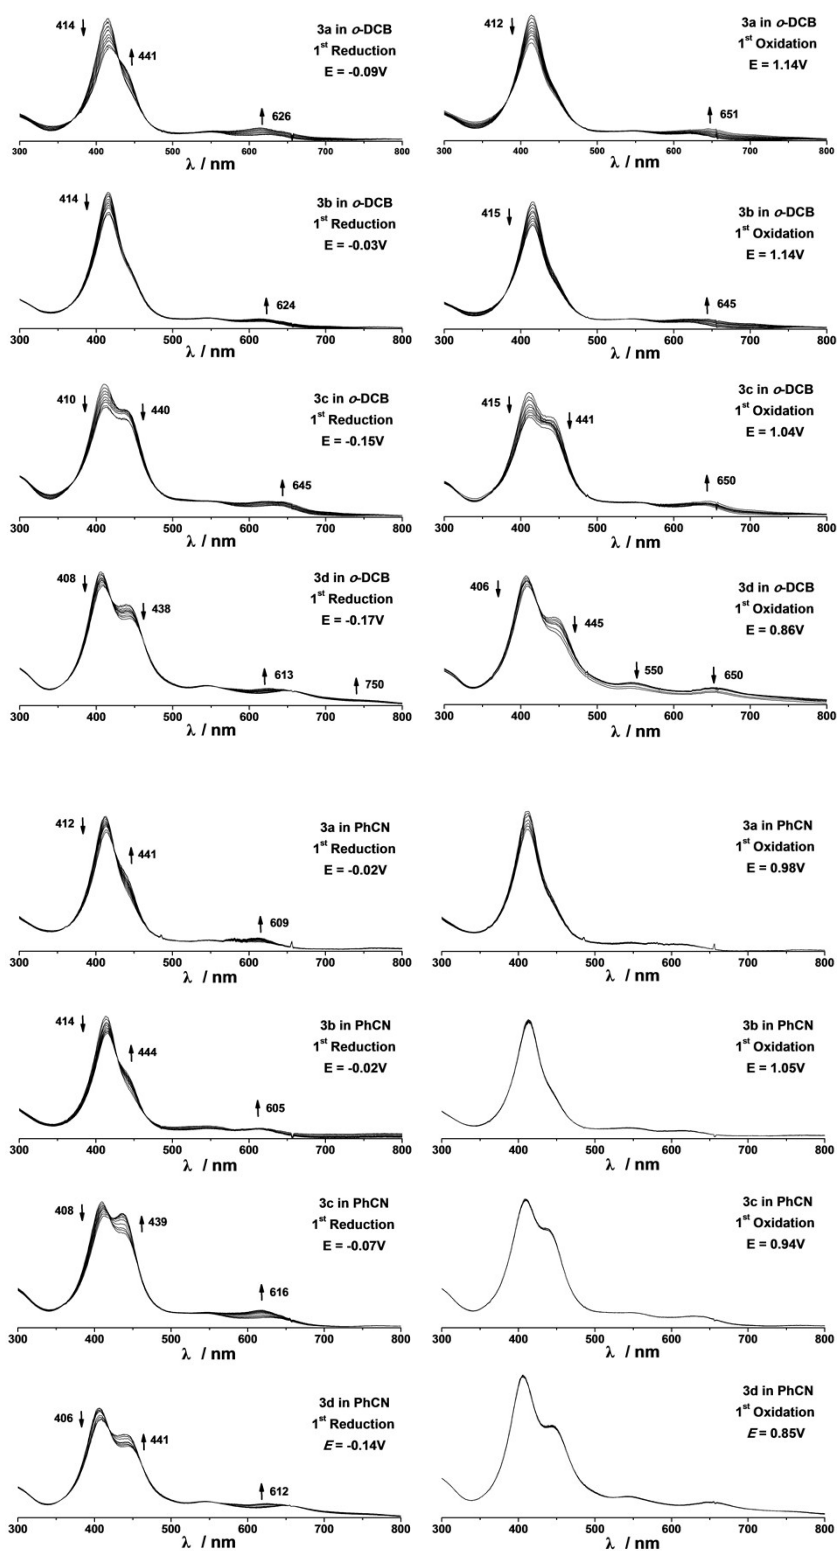

**Figure S4** *In situ* spectroelectrochemical measurements of **3a-d** in *o*-DCB containing 0.1 M  $[\text{NBu}_4]^+[\text{ClO}_4]^-$  (TBAP) as a supporting electrolyte.

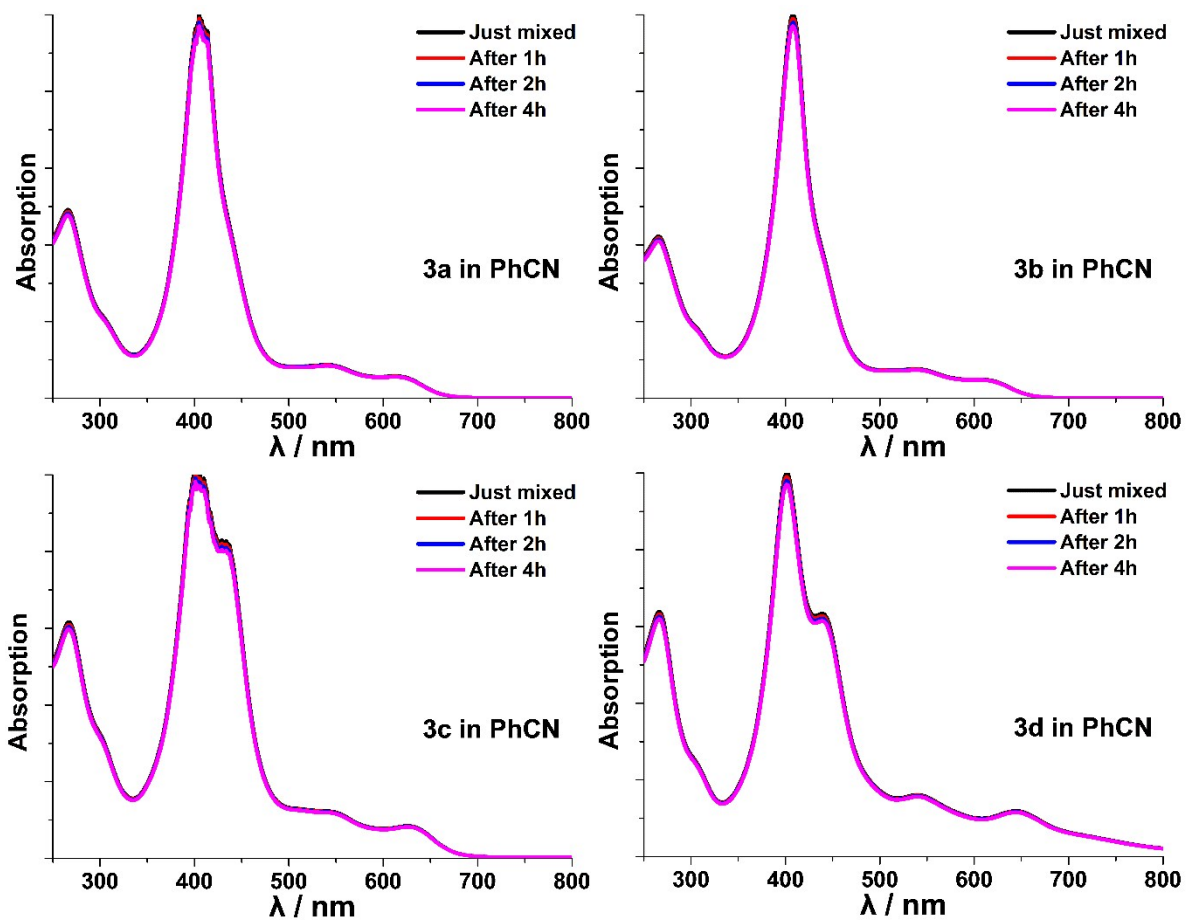

Figure S5 Stability test of **3a-d** in PhCN containing 10.0 eq TFA.

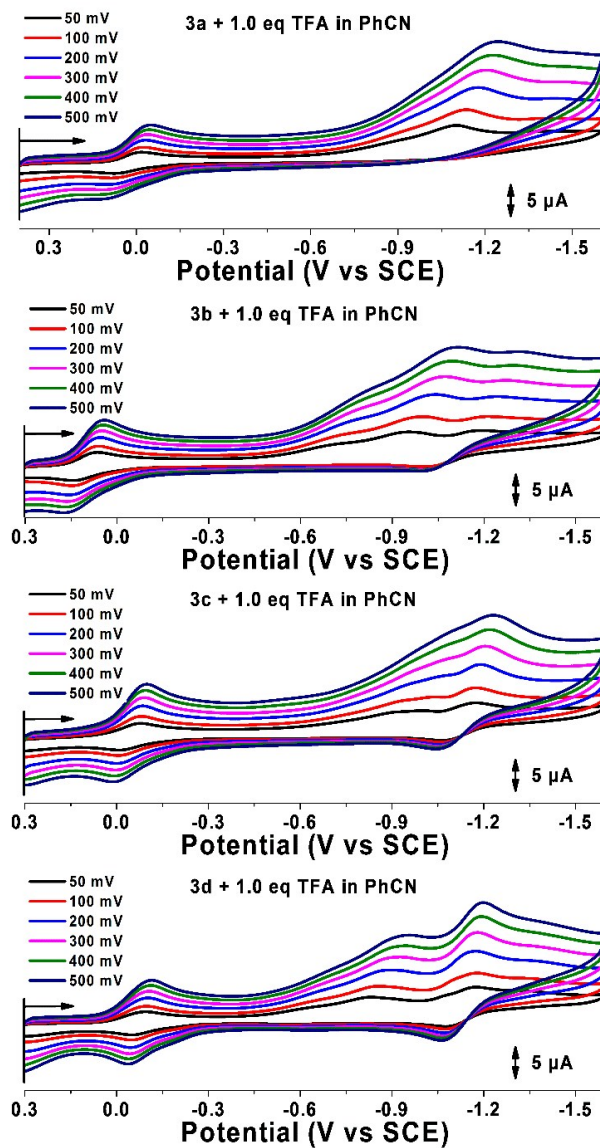

**Figure S6** Reductive electrochemical measurements at 50–500 mV/s scanning speed of Cu(III)corroles **3a-d** in the presence of 1.0 eq of TFA in PhCN containing 0.1 M  $[\text{NBu}_4]^+[\text{ClO}_4]^-$  (TBAP) as a supporting electrolyte.

## 1. X-ray Crystallography

**Table S1.** Crystal data of **3d**.

| Sample-Temperature (K)                    | Data                |
|-------------------------------------------|---------------------|
| Space group                               | P-1                 |
| $a$ (Å)                                   | 8.525(2),           |
| $b$ (Å)                                   | 12.695(17),         |
| $c$ (Å)                                   | 18.656(15)          |
| $\alpha, \beta, \gamma$ (°)               | 71.59, 82.11, 80.69 |
| $V$ (Å <sup>3</sup> )                     | 1882.6(9)           |
| $Z$                                       | 2                   |
| $F(000)$                                  | 840.0               |
| $\mu$ (mm <sup>-1</sup> )                 | 0.637               |
| Observed reflections ( $I > 2\sigma(I)$ ) | 20148               |
| Independent reflections                   | 6602                |
| $R_1$                                     | 0.0689              |
| $wR_2$                                    | 0.1634              |



## 2. TD-DFT Calculations

**Table S2.** The calculated UV-visible absorption spectra of the B3LYP optimized geometry of **3a-d** and the 3Ph and 1Ph model complexes obtained by using the CAM-B3LYP functional of the Gaussian 09 software package with 6-31G(d) basis sets.

| 3Ph                              |                   |                 |                  |      |                              |                                             |
|----------------------------------|-------------------|-----------------|------------------|------|------------------------------|---------------------------------------------|
| Band <sup>a</sup> # <sup>b</sup> | Calc <sup>c</sup> |                 | Exp <sup>d</sup> |      | Wave Function <sup>e</sup> = |                                             |
| 1                                | ----              | ----            | ----             | ---- | ----                         | Ground State                                |
| Q                                | 4                 | 20.2 495 (0.10) | ----             | ---- | ----                         | 74% s → -a; 19% a → -s; ...                 |
|                                  | 5                 | 21.2 471 (0.03) | ----             | ---- | ----                         | 62% a → -a; 33% s → -s; ...                 |
| B                                | 10                | 27.1 369 (0.52) | ----             | ---- | ----                         | 59% s → -s; 30% a → -a; ...                 |
|                                  | 11                | 27.8 360 (0.55) | ----             | ---- | ----                         | 66% a → -s; 17% a → -s; ...                 |
| 1Ph                              |                   |                 |                  |      |                              |                                             |
| Band <sup>a</sup> # <sup>b</sup> | Calc <sup>c</sup> |                 | Exp <sup>d</sup> |      | Wave Function <sup>e</sup> = |                                             |
| 1                                | ----              | ----            | ----             | ---- | ----                         | Ground State                                |
| Q                                | 4                 | 20.0 500 (0.11) | ----             | ---- | ----                         | 72% s → -a; 17% a → -s; ...                 |
|                                  | 5                 | 20.9 478 (0.03) | ----             | ---- | ----                         | 62% a → -a; 28% s → -s; ...                 |
| B                                | 10                | 27.0 371 (0.48) | ----             | ---- | ----                         | 48% s → -s; 27% a → -a; 14% s → LUMO+2; ... |
|                                  | 11                | 27.5 364 (0.60) | ----             | ---- | ----                         | 53% a → -s; 18% a → -s; 15% a → LUMO+2; ... |
| 3a                               |                   |                 |                  |      |                              |                                             |
| Band <sup>a</sup> # <sup>b</sup> | Calc <sup>c</sup> |                 | Exp <sup>d</sup> |      | Wave Function <sup>e</sup> = |                                             |
| 1                                | ----              | ----            | ----             | ---- | ----                         | Ground State                                |
| Q                                | 4                 | 20.4 491 (0.09) | 16.3 612         | ---- | ----                         | 70% s → -a; 18% a → -s; ...                 |
|                                  | 5                 | 20.9 478 (0.02) | 18.5 541         | ---- | ----                         | 61% a → -a; 27% s → -s; ...                 |
| B                                | 10                | 26.9 372 (0.52) | 23.1 432         | ---- | ----                         | 48% s → -s; 29% a → -a; 12% s → LUMO+2; ... |
|                                  | 11                | 27.3 366 (0.62) | 24.5 408         | ---- | ----                         | 52% a → -s; 19% a → -s; 15% a → LUMO+2; ... |
| 3b                               |                   |                 |                  |      |                              |                                             |
| Band <sup>a</sup> # <sup>b</sup> | Calc <sup>c</sup> |                 | Exp <sup>d</sup> |      | Wave Function <sup>e</sup> = |                                             |
| 1                                | ----              | ----            | ----             | ---- | ----                         | Ground State                                |
| Q                                | 4                 | 20.0 501 (0.10) | 16.4 610         | ---- | ----                         | 71% s → -a; 20% a → -s; ...                 |
|                                  | 5                 | 21.0 477 (0.02) | 18.5 542         | ---- | ----                         | 60% a → -a; 32% s → -s; ...                 |
| B                                | 10                | 26.6 375 (0.51) | 23.0 434         | ---- | ----                         | 59% s → -s; 30% a → -a; ...                 |
|                                  | 11                | 27.2 368 (0.63) | 24.4 410         | ---- | ----                         | 66% a → -s; 20% a → -s; ...                 |
| 3c                               |                   |                 |                  |      |                              |                                             |
| Band <sup>a</sup> # <sup>b</sup> | Calc <sup>c</sup> |                 | Exp <sup>d</sup> |      | Wave Function <sup>e</sup> = |                                             |

|                                       |                         |      |      |                        |      |                                    | <b>3d</b>                                                               |  |  |  |
|---------------------------------------|-------------------------|------|------|------------------------|------|------------------------------------|-------------------------------------------------------------------------|--|--|--|
| <b>Band<sup>a</sup> #<sup>b</sup></b> | <b>Calc<sup>c</sup></b> |      |      | <b>Exp<sup>d</sup></b> |      | <b>Wave Function<sup>e</sup> =</b> |                                                                         |  |  |  |
| ----                                  | <b>1</b>                | ---- | ---- | ----                   | ---- | Ground State                       |                                                                         |  |  |  |
| <b>Q</b>                              | <b>4</b>                | 19.9 | 502  | (0.12)                 | 16.0 | 626                                | <b>73% s</b> → -a; <b>17% a</b> → -s; ...                               |  |  |  |
|                                       | <b>5</b>                | 20.9 | 478  | (0.02)                 | 18.4 | 544                                | <b>62% a</b> → -a; <b>29% s</b> → -s; ...                               |  |  |  |
| <b>B</b>                              | <b>10</b>               | 26.9 | 372  | (0.52)                 | 23.5 | 426                                | <b>48% s</b> → -s; <b>28% a</b> → -a; 14% s → LUMO+2; ...               |  |  |  |
|                                       | <b>11</b>               | 27.5 | 364  | (0.59)                 | 24.9 | 402                                | <b>53% a</b> → -s; <b>17% a</b> → -s; 15% a → LUMO+2; ...               |  |  |  |
|                                       |                         |      |      |                        |      |                                    | <b>3d</b>                                                               |  |  |  |
| <b>Band<sup>a</sup> #<sup>b</sup></b> | <b>Calc<sup>c</sup></b> |      |      | <b>Exp<sup>d</sup></b> |      | <b>Wave Function<sup>e</sup> =</b> |                                                                         |  |  |  |
| ----                                  | <b>1</b>                | ---- | ---- | ----                   | ---- | Ground State                       |                                                                         |  |  |  |
| <b>Q</b>                              | <b>4</b>                | 19.8 | 505  | (0.13)                 | 15.5 | 644                                | <b>73% s</b> → -a; <b>16% a</b> → -s; ...                               |  |  |  |
|                                       | <b>5</b>                | 20.9 | 479  | (0.02)                 | 18.2 | 548                                | <b>60% a</b> → -a; <b>31% s</b> → -s; ...                               |  |  |  |
| <b>B</b>                              | <b>10</b>               | 26.6 | 376  | (0.28)                 | 23.0 | 435                                | <b>25% s</b> → -s; 17% s → LUMO; <b>16% a</b> → -a; 10% s → LUMO+2; ... |  |  |  |
|                                       | <b>12</b>               | 27.4 | 365  | (0.51)                 | 24.8 | 403                                | <b>48% a</b> → -s; <b>18% a</b> → -s; 15% a → LUMO+2; ...               |  |  |  |

a – Band assignment described in the text. b – The number of the state assigned in terms of ascending energy within the TD-DFT calculation. c – Calculated band energies ( $10^3 \cdot \text{cm}^{-1}$ ), wavelengths (nm) and oscillator strengths in parentheses (f). d – Observed energies ( $10^3 \cdot \text{cm}^{-1}$ ) and wavelengths (nm) in **Figure 2**. e – The wave functions based on the eigenvectors predicted by TD-DFT. One-electron transitions associated with the four frontier  $\pi$ -MOs of Gouterman's 4-orbital model<sup>[S1]</sup> are highlighted in bold. Michl's a, s, -a and -s nomenclature<sup>[S2]</sup> for the four frontier  $\pi$ -MOs is used to facilitate comparison of the transition of porphyrinoids with differing symmetries.

## References

- [S1] Gouterman, M. Optical Spectra and Electronic Structure of Porphyrins and Related Rings. In *The Porphyrins*, vol. III, Dolphin D. (Ed.) Academic Press: New York, 1978, 1-165.
- [S2] (a) Michl, J. *J. Am. Chem. Soc.***1978**, *100*, 6801-6811. (b) Michl, J. *J. Am. Chem. Soc.***1978**, *100*, 6812-6818. (c) Michl, J. *Pure Appl. Chem.***1980**, *52*, 1549-1563. (d) Michl, J. *Tetrahedron***1984**, *40*, 3845-3934.
